# Supplementary material
Source: HighWire-hosted journal article supplement (https://www.cmaj.ca/highwire/filestream/58081/field_highwire_adjunct_files/0/obesity-franco-f.pdf)
Supplement: obesity-franco-f.pdf [file obesity-franco-f.pdf]

## Santé publique

## La réduction de l'obésité et ses possibles répercussions : que nous apprend la «période spéciale» des Cubains?

Manuel Franco MD PhD, Pedro Orduñez MD PhD, Benjamín Caballero MD PhD, Richard S. Cooper MD

Dans un récent numéro de l'*American Journal of Epidemiology*<sup>1</sup>, nous avons décrit le lien entre une perte de poids soutenue subie par une population entière et un déclin de la mortalité de toutes causes et des taux de mortalité des suites du diabète et des maladies cardiovasculaires à Cuba. Cette perte de poids généralisée a été l'une des répercussions de la crise économique, la fameuse «période spéciale», qu'a connue Cuba au cours des années 1990, après l'effondrement de l'Union soviétique. Cette crise économique et sociale a toutefois aussi eu des conséquences négatives pour la santé. Par exemple, une écloison de neuropathie, probablement due à des carences vitaminiques, a affecté 50 000 personnes entre 1992 et 1993<sup>2</sup>, et le déclin de la mortalité infantile dont Cuba jouissait s'est inversé entre 1990 et 1993<sup>3</sup>. L'écloison des cas de neuropathie n'a affecté ni les enfants, ni les personnes âgées, ni les femmes enceintes, en raison du système spécial de rationnement préventif mis en place pour les protéger. La population cubaine a fait preuve de beaucoup de cohésion sociale, surtout à l'intérieur des familles, pendant cette époque de dures contraintes économiques<sup>2</sup>.

Durant la «période spéciale», l'apport énergétique quotidien *per capita* est passé de 2899 kcal (12 180 kJ) à 1863 kcal (7820 kJ) et la dépense énergétique a augmenté en raison des pénuries de carburant qui ont forcé les gens à marcher ou circuler à bicyclette, faute de transport en commun. La proportion d'adultes physiquement actifs est ainsi passée de 30 % à 67 %. Des études représentatives de la population réalisées à Cienfuegos de Cuba en 1991 et en 1995 ont fait état de baisses de 1,5 unité de l'indice de masse corporelle. La prévalence de l'obésité a chuté de 14 % à 7 %, la prévalence de l'embonpoint est passée de 26 % à 27 % et la prévalence du poids normal est passée de 60 % à 66 % (Figure 1). La réduction de poids dans la population représente une perte pondérale modeste de 4 à 5 kg ou de 5 % à 6 % du poids corporel par adulte. Au cours des années suivantes, les taux de mortalité ont nettement diminué entre 1997 et 2002 : de 51 % dans le cas du diabète, de 35 % dans le cas de la coronaropathie, de 20 % dans le cas de l'accident vasculaire cérébral et de 18 % pour la mortalité de toutes causes.

L'important déclin de la mortalité de toutes causes et des taux de mortalité par suite de maladie cardiovasculaire et de diabète que nous avons observé indique que des politiques universelles visant à réduire l'apport énergétique tout en préservant des apports nutritionnels suffisants et en accroissant l'activité physique pourraient entraîner une perte pondérale significative à l'échelle des populations. Cette ex-

## Points clés

- Durant la crise économique qu'a traversée Cuba au cours des années 1990, l'apport énergétique *per capita* a graduellement diminué à 1863 kcal/j (7820 kJ/j) et la proportion d'adultes physiquement actifs a augmenté de 30 % à 67 %. Ces changements ont affecté la population entière et se sont maintenus pendant près de 5 ans.
- Le résultat a été une perte de poids modeste mais généralisée (4 à 5 kg ou 5 % à 6 % de la masse corporelle) et un déclin de la mortalité de toutes causes et des taux de mortalité des suites du diabète et de la maladie cardiovasculaire.
- Les pays comme le Canada et les États-Unis, où plus de la moitié de la population souffre soit d'embonpoint, soit d'obésité, bénéficieraient de politiques de santé publique axées sur une perte de poids à l'échelle de leurs populations.
- Des changements à l'échelle des populations seraient nécessaires à tous les niveaux sociaux et politiques, incluant à l'échelon des provinces, territoires et municipalités, de même que dans les écoles, les lieux de travail et les foyers.
- Les interventions seraient entre autres : rendre les fruits et légumes plus accessibles et abordables, réduire l'accès aux aliments hypercaloriques et en augmenter le prix, et promouvoir la marche et la bicyclette comme moyens de transport.

périence indique en outre que certaines stratégies de santé publique pourraient améliorer considérablement le tableau des maladies liées à l'obésité, comme le diabète et la maladie cardiovasculaire.

À l'heure actuelle, une épidémie d'obésité affecte la plupart des pays du monde<sup>4</sup>. En 2004, 23 % des adultes canadiens étaient obèses et 36 % avaient de l'embonpoint<sup>5</sup> (Figure 1). La même année, aux États-Unis, 32 % de la population adulte était obèse et 34 % avait de l'embonpoint<sup>6</sup>.

Lorsqu'on analyse les répercussions de la «période spéciale» à Cuba, il faut savoir qu'avant la crise, la population cubaine souffrait peu d'obésité (14 %)<sup>1</sup>. Les effets d'une telle perte pondérale généralisée au sein de la population pourraient donc être plus marqués s'ils s'observaient au Canada et

Départements d'épidémiologie et de médecine du Centre Welch pour la prévention, l'épidémiologie et la recherche clinique (Franco), École de santé publique Johns Hopkins Bloomberg, Baltimore (MD); Hôpital universitaire Dr Gustavo Aldereguía Lima (Orduñez), Cienfuegos (Cuba); Centre de nutrition humaine du Département de santé internationale (Caballero), École de santé publique Johns Hopkins Bloomberg, Baltimore (MD) et Département de médecine préventive et d'épidémiologie (Cooper) de la faculté de médecine Stritch de l'Université Loyola, Maywood (ILL).

aux États-Unis, où plus de la moitié de la population souffre soit d'embonpoint soit d'obésité<sup>4,5</sup>.

Le débat actuel entourant l'effet de la masse corporelle sur la mortalité rappelle la difficulté inhérente à toute interprétation de l'impact de l'alimentation, de l'activité physique et du poids corporel sur la mortalité<sup>6-10</sup>. C'est pourquoi la prudence s'impose lorsqu'on interprète ce type d'études d'observation. D'autres études, qui se penchent actuellement sur l'impact d'une perte de poids volontaire sur la morbidité et la mortalité cardiovasculaires chez des patients atteints de diabète, comme l'étude Look AHEAD (*Action for Health in Diabetes*)<sup>11</sup>, contribueront sans doute à clarifier la question. Les résultats préliminaires de cette étude montrent qu'une intervention coûteuse et sophistiquée, axée sur l'amélioration de l'hygiène de vie des individus pour obtenir une perte de poids de 8 %, peut donner lieu à d'importantes baisses de la tension artérielle et des taux de triglycérides et de cholestérol à lipoprotéines de haute densité<sup>12</sup>.

L'important corpus de recherche dont on dispose au sujet des interventions non pharmacologiques montre que des changements comportementaux s'imposent de toute urgence et ce, des 2 côtés du bilan énergétique, soit une réduction de l'apport calorique et une augmentation de la dépense énergétique<sup>12</sup>, et que le maintien de la perte de poids requiert des taux d'activité physique élevés<sup>13</sup>.

Dans son analyse classique des interventions de préventions, Rose<sup>14</sup> a décrit 2 approches : 1 approche pour les sujets à risque élevé, qui cherche à protéger les individus particulièrement vulnérables, et 1 approche axée sur les populations, qui cherche à infléchir les causes sous-jacentes de cet état répandu. Pour expliquer les différences de prévalence d'un état de santé donné dans une population à 2 points dans

le temps, il nous faudrait comprendre les déterminants de la santé qui affectent la population dans son ensemble. L'approche générale tente d'influer de manière positive sur la distribution globale de l'exposition à ces facteurs. Dans le cas de la prévention de l'obésité, l'objectif serait d'abaisser la masse corporelle moyenne, soit précisément ce qui s'est produit à Cuba durant la «période spéciale». Cette modification de la masse corporelle moyenne peut expliquer en partie les imposants effets globaux observés sur la mortalité par suite de maladies liées au poids, comme le diabète et la maladie cardiovasculaire. Les stratégies visant des populations entières sont les meilleures approches préventives pour corriger des facteurs de risque à distribution continue, comme l'hypertension artérielle et l'hypercholestérolémie<sup>14</sup>, et le poids corporel pourrait être un facteur de risque important qui répondrait à des interventions généralisées.

Du point de vue de la santé publique, plusieurs questions émergent : que peut nous apprendre l'expérience cubaine sur la réduction du poids corporel à l'échelle d'une population entière dans un pays industrialisé comme le Canada? Par quelles approches de santé publique peut-on obtenir des réductions de poids à l'échelle d'une population entière? Dans la Figure 1, nous évoquons une perte de poids hypothétique à l'échelle de la population du Canada, qui permettrait de réduire de près de la moitié la prévalence de l'obésité. Tout comme à Cuba, la réduction de l'apport énergétique *per capita* et l'augmentation des taux d'activité physique, s'ils sont maintenus pendant au moins 5 ans, entraîneraient une diminution de 1,5 unité de l'indice de masse corporelle ou une perte de poids de 5 % par adulte.

Dans le contexte d'une société comme celle du Canada, les changements à l'échelle d'une population doivent avoir une influence directe sur l'apport énergétique total et le degré

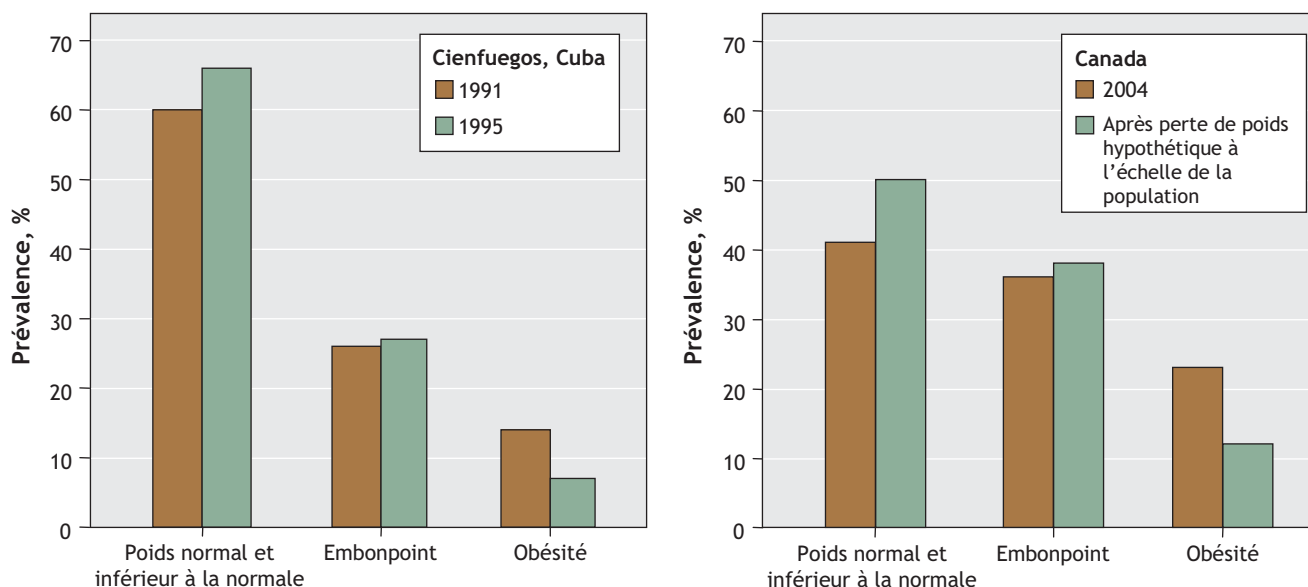

**Figure 1** : À gauche : Changement de la prévalence de l'obésité à Cienfuegos, Cuba, entre 1991 et 1995, période durant laquelle l'apport énergétique a diminué et l'activité physique a augmenté, entraînant une perte de poids à l'échelle de la population et une réduction de 50 % de l'obésité. À droite : Impact comparable sur la prévalence de l'obésité au Canada après une perte de poids hypothétique à l'échelle de la population.

d'activité physique de tous les individus. Il est possible d'obtenir une réduction de l'apport énergétique en augmentant la consommation d'aliments à faible teneur énergétique, comme les fruits et les légumes, et en réduisant la consommation des aliments hypercaloriques. Paradoxalement, ces changements sont le plus susceptibles de survenir si des modifications structurelles sont mises en place pour identifier la population comme unité d'intervention. Les changements à l'échelle de la population seraient nécessaires à tous les niveaux sociaux et politiques, y compris au niveau des provinces, des territoires et des municipalités, et des écoles, des lieux de travail et des foyers. Dans des pays comme le Canada et les États-Unis où l'obésité affecte de manière disproportionnée certaines minorités et populations à faible revenu<sup>15</sup>, de telles politiques universelles devraient impérativement tenir compte de ces groupes pour atténuer l'impact des disparités pré-existantes<sup>16</sup>. Les directives cliniques canadiennes de 2006 pour la prévention de l'obésité reconnaissent déjà la nécessité d'instaurer des stratégies à l'échelle des populations qui passeront obligatoirement par une coopération entre les décideurs et autres intervenants<sup>17</sup>. Raine et Wilson<sup>18</sup> ont mis en lumière les changements structurels visant la prévention de l'obésité dans les directives de 2006.

Un certain nombre d'interventions pourraient affecter directement l'apport énergétique total et l'activité physique de la population entière, d'où une réduction généralisée du poids. Les interventions à l'échelle des populations concernant l'apport énergétique devraient inclure la promotion des aliments nutritifs à faible teneur énergétique, par exemple rendre des fruits et légumes plus accessibles<sup>19</sup> et abordables<sup>15</sup>, et l'accès réduit aux aliments hypercaloriques accompagné d'une augmentation de leur prix. Les interventions axées sur l'activité physique doivent inclure la promotion de la marche et de la bicyclette comme moyens de transport. De plus, les urbanistes, les concepteurs des écoles et des lieux de travail devraient prioriser l'activité physique dans leurs plans.

Dans les sociétés contemporaines, où plus de la moitié des individus souffrent soit d'embonpoint, soit d'obésité, des interventions à l'échelle des populations visant à maintenir le poids corporel à l'intérieur des limites de la normale sont tout indiquées pour prévenir des maladies comme le diabète et la maladie cardiovasculaire. Comme on l'a vu à Cuba, de petits changements individuels affectant une population entière recèlent un important potentiel préventif pour ce qui est des maladies très prévalentes.

**Conflit d'intérêts :** Aucun.

Cet article a été fait l'objet d'un examen par les pairs.

## RÉFÉRENCES

1. Franco M, Ordunez P, Caballero B et coll., Impact of energy intake, physical activity, and population-wide weight loss on cardiovascular disease and diabetes mortality in Cuba, 1980–2005. *Am J Epidemiol* 2007;166:1374–80.
2. Ordunez-Garcia PO, Nieto FJ, Espinosa-Brito AD et coll., Cuban epidemic neuropathy, 1991 to 1994: history repeats itself a century after the “amblyopia of the blockade.” *Am J Public Health* 1996;86:738–43.
3. Ministerio de Salud Publica. Estadísticas de salud en Cuba. La Havane (Cuba) : Ministerio de Salud Publica; 2006.
4. Caballero B. The global epidemic of obesity: an overview. *Epidemiol Rev* 2007; 29:1–5.
5. Tjepkema M. Obésité mesurée chez les adultes au Canada : poids et grandeur mesurés. Dans : *Nutrition : résultats de l'enquête sur la santé dans les collectivités canadiennes*. Ottawa : Statistique Canada; 2007. Cat no 82-620-MWE2005001. Accessible à l'adresse : [www.statcan.ca/bsolc/francais/bsolc?catno=82-620-M20050018060](http://www.statcan.ca/bsolc/francais/bsolc?catno=82-620-M20050018060) (consulté le 23 janvier 2008).
6. Wang Y, Beydoun MA. The obesity epidemic in the United States — gender, age, socioeconomic, racial/ethnic, and geographic characteristics: a systematic review and meta-regression analysis. *Epidemiol Rev* 2007;29:6–28.
7. Flegal KM. The epidemic of obesity: What's in a name? [éditorial] *Int J Epidemiol* 2006;35:72–4.
8. Caballero B, Wang Y. Obesity and mortality—light at the end but still a long tunnel [éditorial]. *Int J Epidemiol* 2006;35:21–2.
9. Flegal KM, Graubard BI, Williamson DF et coll., Excess deaths associated with underweight, overweight, and obesity. *JAMA* 2005;293:1861–7.
10. Flegal KM, Graubard BI, Williamson DF et coll., Cause-specific excess deaths associated with underweight, overweight, and obesity. *JAMA* 2007;298:2028–37.
11. Ryan DH, Espeland MA, Foster GD et coll., Look AHEAD (Action for Health in Diabetes): design and methods for a clinical trial of weight loss for the prevention of cardiovascular disease in type 2 diabetes. *Control Clin Trials* 2003;24:610–28.
12. Look AHEAD Research Group. Reduction in weight and cardiovascular disease risk factors in individuals with type 2 diabetes: one-year results of the Look AHEAD trial. *Diabetes Care* 2007;30:1374–83.
13. Phelan S, Wyatt HR, Hill JO et coll., Are the eating and exercise habits of successful weight losers changing? *Obesity (Silver Spring)* 2006;14:710–6.
14. Rose G. Sick individuals and sick populations. *Int J Epidemiol* 2001;30:427–32.
15. Drewnowski A. The real contribution of added sugars and fats to obesity. *Epidemiol Rev* 2007;29:160–71.
16. La Commission des déterminants sociaux de la santé, Organisation mondiale de la santé. Measurement and evidence knowledge network. *The social determinants of health: developing an evidence base for political action*. Genève : L'Organisation; 2007.
17. Lau DCW, Douketis JD, Morrison KM et coll., 2006 Canadian clinical practice guidelines on the management and prevention of obesity in adults and children [résumé]. *CMAJ* 2007;176:S1–13.
18. Raine K, Wilson E. Obesity prevention in the Canadian population: policy recommendations for environmental change. *CMAJ* 2007;176:S106–10.
19. Franco M, Nandi A, Glass T et coll., Smoke before food: a tale of Baltimore City. *Am J Public Health* 2007;97:1178.

*Correspondance :* D<sup>r</sup> Manuel Franco, Department of Epidemiology, Johns Hopkins Bloomberg School of Public Health, 2024 E Monument St., Ste. 2-607, Baltimore MD 21205, USA; télécopieur 410 955-0476; [mfranco@jhsph.edu](mailto:mfranco@jhsph.edu)
